# Supplementary material for: Effects of summer savory (Satureja hortensis L.) and sweet corn (Zea mays L. saccharata) intercropping on crop production and essential oil profiles of summer savory
Source: PeerJ. 2023 Jan 30;11:e14753. doi: 10.7717/peerj.14753 (PMC9893908; doi:10.7717/peerj.14753)
Supplement: Supplemental Information 1 [file peerj-11-14753-s001.xlsx]

## Sheet: Sheet1
			y1	y2	y3
Treat	Rep	Year	Sweet corn yield	Summer Savory yield	Essential oil
1	1	1	2200	780	1.92
2	1	1	1700	620	1.79
3	1	1	2090	500	2.24
4	1	1	2130	330	1.73		Treat
1	2	1	1800	740	1.79		C100	1
2	2	1	1500	610	1.98		C25+M75	2
3	2	1	1680	480	2.26		C50+M50	3
4	2	1	1750	310	1.88		C75+M25	4
1	3	1	2420	710	1.72
2	3	1	1610	510	1.69		Traits
3	3	1	2130	460	1.54		Sweet corn yield	y1
4	3	1	2320	330	1.53		Summer Savory yield	y2
1	1	2	2800	810	2.16		Essential oil	y3
2	1	2	2050	690	1.95
3	1	2	2420	560	1.79		Year
4	1	2	2565	500	1.65		2019	1
1	2	2	2710	790	2.05		2021	2
2	2	2	1900	700	1.85
3	2	2	2430	570	1.71
4	2	2	2540	495	1.62
1	3	2	2710	850	1.94
2	3	2	1900	650	1.72
3	3	2	2398	540	1.64
4	3	2	2510	510	1.59
